# Supplementary material for: CRISPR/Cas9-3NLS/sgHMGA2@PDA nanosystem is the potential efficient gene editing therapy for gastric cancer with HMGA2 high expression
Source: PubMed Central journal article supplement (PMC9479195; doi:10.3389/fonc.2022.978533), 2022-09-02
Supplement: DataSheet_1.pdf [file DataSheet_1.pdf]

## Supplementary Material

**Table S1** Gene editing efficiency of different RNP delivery systems

| Delivery system                                | Cell Type           | Efficiency | Refs             |
|------------------------------------------------|---------------------|------------|------------------|
| <b>CRISPR/Cas9<sub>-3NLS</sub>/sgHMGA2@PDA</b> | <b>MKN-45 cells</b> | <b>82%</b> | <b>This work</b> |
| Metal organic frameworks                       | MCF-7 cells         | ~60%       | [1]              |
| Graphene oxide                                 | AGS cells           | ~39%       | [2]              |
| Black phosphorus nanosheets                    | MCF-7 cells         | 32.1%      | [3]              |
| Calcium phosphate                              | Protoplast cells    | 20%        | [4]              |
| Gold nanocluster                               | A375 cells          | 26.2%      | [5]              |
| DNA nanoclews                                  | 3T3-L1 cells        | 75%        | [6]              |
| Chitosan nanoparticles                         | U2OS cells          | 55.8%      | [7]              |
| Poly( $\beta$ -amino ester) nanoparticles      | HEK293T cells       | 77%        | [8]              |
| Lipid nanoparticles                            | HEK cells           | 70%        | [9]              |
| Lipid nanoparticles                            | Jurkat T cells      | 8%         | [10]             |

**Amino acid sequences of the CRISPR/Cas9:**

|                                                                 |     |     |     |      |
|-----------------------------------------------------------------|-----|-----|-----|------|
| 10                                                              | 20  | 30  | 40  | 50   |
| MNFKILPIAI DLGVKNTGVF SAFYQKGTSL ERLDNKNGKV YELSKDSYTL          |     |     |     |      |
| 60                                                              | 70  | 80  | 90  | 100  |
| LMNNRTARRH QRRGIDRKQL VKRFLKLIWT EQLNLEWDKD TQQAISFLFN          |     |     |     |      |
| 110                                                             | 120 | 130 | 140 | 150  |
| RRGFSFITDG YSPEYLNIVP EQVKAILMDI FDDYNGEDDL DSYLKLATEQ          |     |     |     |      |
| 160                                                             | 170 | 180 | 190 | 200  |
| ESKISEIYNK LMQKILEFKL MKLCTDIKDD KVSTKTL <b>KEI</b> TSYEFELLAD  |     |     |     |      |
| 210                                                             | 220 | 230 | 240 | 250  |
| YLANYSESLK TQKFSYTDKQ GNL <b>KE</b> LSYYH HDKYNIQEFL KRHATINDRI |     |     |     |      |
| 260                                                             | 270 | 280 | 290 | 300  |
| LDTLLTDDLD IWNFNFEKFD FDKNEEKLN QEDKDHIQAH LHHFVFAVNK           |     |     |     |      |
| 310                                                             | 320 | 330 | 340 | 350  |
| IKSEMASGGR HRSQYFQEIT NVLDENNHQE GYLKNFCENL HNKKYSNLSV          |     |     |     |      |
| 360                                                             | 370 | 380 | 390 | 400  |
| KNLVNLIGNL SNLELKPLRK YFNDKIHAKA DHWDEQKfte TYCHWILGEW          |     |     |     |      |
| 410                                                             | 420 | 430 | 440 | 450  |
| RVGVKDQDKK DGAKYSYKDL CNELKQKVTk AGLVDFLLEL DPCRTIPPYL          |     |     |     |      |
| 460                                                             | 470 | 480 | 490 | 500  |
| DNNNRKPPKC QSLILNPKFL DNQYPNWQQY LQELKKLQSI QNYLDSFETD          |     |     |     |      |
| 510                                                             | 520 | 530 | 540 | 550  |
| LKVLKSSKDQ PYFVEYKSSN QQIASGQRDY KDL DARILQF IFDRVKASDE         |     |     |     |      |
| 560                                                             | 570 | 580 | 590 | 600  |
| LLLNEIYFQA KKLKQKASSE LEKLESSKKL DEVIANSQLS QILKSQHTNG          |     |     |     |      |
| 610                                                             | 620 | 630 | 640 | 650  |
| IFEQGTFLHL VCKYYKQRQR ARDSRLYIMP EYRYDKKLHK YNNTGRFDDDD         |     |     |     |      |
| 660                                                             | 670 | 680 | 690 | 700  |
| NQLLYC�HK PRQKRYQLLN DLAGVLQVSP NFLKDKIGSD DDLFISKWLV           |     |     |     |      |
| 710                                                             | 720 | 730 | 740 | 750  |
| EHIRGFKKAC EDSLKIQKDN RGLLNHKINI ARNTKGKCE <b>KE</b> IFNLICKIE  |     |     |     |      |
| 760                                                             | 770 | 780 | 790 | 800  |
| GSEDKKGNyK HGLAYELGVL LFGEPNEASK PEFDRKIKKF NSIYSFAQIQ          |     |     |     |      |
| 810                                                             | 820 | 830 | 840 | 850  |
| QIAFAERKGN ANTCAVCSAD NAHRMQQIKI TEPVEDNKDK IILSAKAQRL          |     |     |     |      |
| 860                                                             | 870 | 880 | 890 | 900  |
| PAIPTRIVDG AVKKMATILA KNIVDDNWQN IKQVLSAKHQ LHIPIITESN          |     |     |     |      |
| 910                                                             | 920 | 930 | 940 | 950  |
| AFEFEPALAD VKGKSLKDRR KKALERISPE NIFKDKNNRI <b>KE</b> FAKGISAY  |     |     |     |      |
| 960                                                             | 970 | 980 | 990 | 1000 |

SGANLTDGDF DGA**KE**EELDHI IPRSHKKYGT LNDEANLICV TRGDNKNKGN  
 1010 1020 1030 1040 1050  
 RIFCLRDLAD NYKLLKQFETT DDLEIEKKIA DTIWDANKKD FKFGNYRSFI  
 1060 1070 1080 1090 1100  
 NLTPQEQKAF RHALFLADEN PIKQAVIRAI NNRNRTFVNG TQRYFAEVLA  
 1110 1120 1130 1140 1150  
 NNIYLRAK**KE**NLNTDKISFD YFGIPTIGNG RGIAEIRQLY EKVDSDIQAY  
 1160 1170 1180 1190 1200  
 AKGDKPQASY SHLIDAMLAF CIAADEHRND GSIGLEIDKN YSLYPLDKNT  
 1210 1220 1230 1240 1250  
 GEVFTKDIFS QIKITDNEFS DKKLVRKKAI EGFNTHRQMT RDGIYAENYL  
 1260 1270 1280 1290 1300  
 PILH**KE**LNE VRKGYTWKNS EEIKIFKGKK YDIQQLNNLV YCLKFVDKPI  
 1310 1320 1330 1340 1350  
 SIDIQISTLE ELRNILTTNN IAATAEYYYI NLKTQKLHEY YIENYNTALG  
 1360 1370 1380 1390 1400  
 YKKYS**KE**MEF LRSLAYRSER VKIKSIDDVK QVLDKDSNFI IGTKITLPFK**K**  
 1410 1420 1430 1440 1450  
**E**WQRLYREWQ NTTIKDDYEF LKSFFNVKSI TKLHKKVRKD FSLPISTNEG  
 1460 1470 1480 1490 1500  
 KFLVKRKTWD NNFIYQILND SDSRADGTKP FIPAFDISKN EIVEAIIDSF  
 1510 1520 1530 1540 1550  
 TSKNIFWLPK NIELQKVDNK NIFAITSKW FEVETPSDLR DIGIATIQYK  
 1560 1570 1580 1590 1600  
 IDNNSRPKVR VKLDYVIDDD SKINYFMNHS LLKSRYPDKV LEILKQSTII  
 1610 1620 1621  
 EFESSGFNKT I**KE**MLGMKLA GIYNETSNN

**Fig. S1.** Amino acid sequences of the CRISPR/Cas9. The KE sequence has been highlighted in yellow.

The sequences are extracted from UniprotKB-A0Q5Y3 (CAS9\_FRATN).

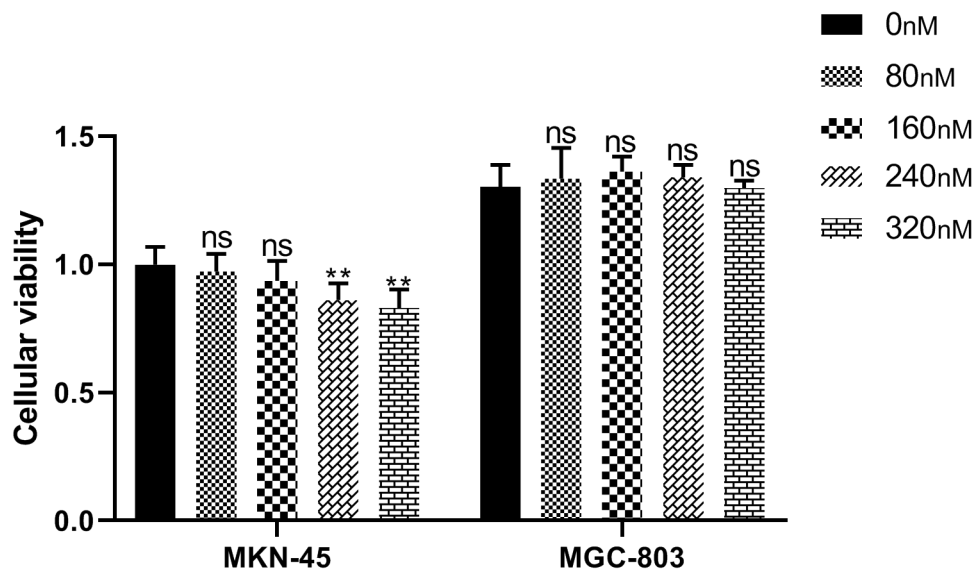

**Fig. S2.** Cell viability of MKN-45 and MGC-803 cells after incubating with CRISPR/Cas9-3NLS@PDA (n=3), ns: no significant differences; \*\*  $P < 0.01$ ; \*\*\*\*  $P < 0.001$ , Student's t test. Error bars represent SD.

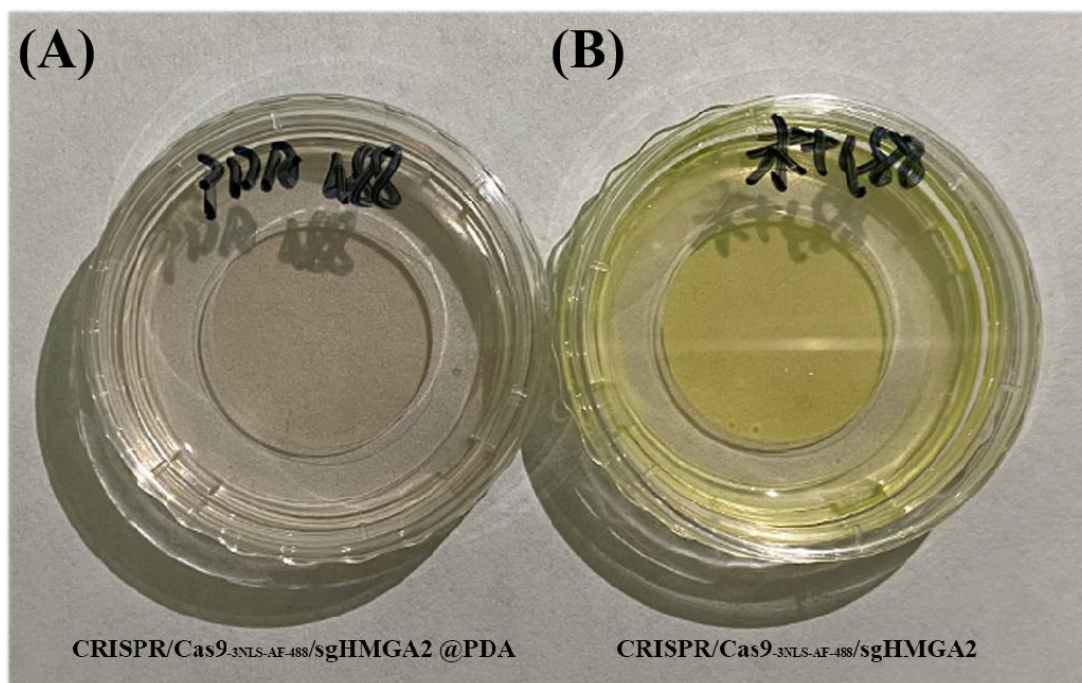

**Fig. S3.** (A) The color of CRISPR/Cas9-3NLS-AF-488/sgHMGA2@PDA solution. (B) The color of CRISPR/Cas9-3NLS-AF-488/sgHMGA2 solution

## References

- [1] M.Z. Alyami, S.K. Alsaiani, Y. Li, S.S. Qutub, F.A. Aleisa, R. Sougrat, J.S. Merzaban, N.M. khashab, Cell-Type-Specific CRISPR/Cas9 Delivery by Biomimetic Metal Organic Frameworks, *J Am Chem Soc* 142 (2020) 1715-1720.
- [2] H. Yue, X. Zhou, M. Cheng, D. Xing, Graphene oxide-mediated Cas9/sgRNA delivery for efficient genome editing, *Nanoscale* 10 (2018) 1063-1071.
- [3] W. Zhou, H. Cui, L. Ying, Enhanced Cytosolic Delivery and Release of CRISPR/Cas9 by Black Phosphorus Nanosheets for Genome Editing, *Angew Chem Int Edit* 57 (2018) 10268-10272.
- [4] S. Li, Z. Song, Biomimetic Mineralization-Based CRISPR/Cas9 Ribonucleoprotein Nanoparticles for Gene Editing, *ACS Appl Mater Interfaces* 11 (2019) 47762-47770.
- [5] E. Ju, T. Li, S. Ramos da Silva, S.J. Gao, Gold Nanocluster-Mediated Efficient Delivery of Cas9 Protein through pH-Induced Assembly-Disassembly for Inactivation of Virus Oncogenes, *ACS Appl Mater Interfaces* 11 (2019) 34717-34724.
- [6] W. Sun, J. Wang, CRISPR-Cas12a delivery by DNA-mediated bioresponsive editing for cholesterol regulation, *Sci Adv* 6 (2020) eaba2983.
- [7] J. Qiao, W. Sun, S. Lin, R. Jin, L. Ma, Y. Liu, Cytosolic delivery of CRISPR/Cas9 ribonucleoproteins for genome editing using chitosan-coated red fluorescent protein, *Chem Commun* 55 (2019) 4707-4710.
- [8] Y. Rui, D.R. Wilson, Carboxylated branched poly( $\beta$ -amino ester) nanoparticles enable robust cytosolic protein delivery and CRISPR-Cas9 gene editing, *Sci Adv* 5 (2019) eaay3255.
- [9] M. Wang, J.A. Zuris, F. Meng, H. Rees, S. Sun, P. Deng, Y. Han, X. Gao, D. pouli, Q. Wu, I. Georgakoudi, D.R. Liu, Q. Xu, Efficient delivery of genome-editing proteins using bioreducible lipid nanoparticles, *Proc Natl Acad Sci U S A* 113 (2016) 2868-2873.

- [10] P. Gee, M.S.Y. Lung, Extracellular nanovesicles for packaging of CRISPR-Cas9 protein and sgRNA to induce therapeutic exon skipping, *Nat Commun* 11 (2020) 1334.
